# Supplementary material
Source: publisher figshare collection journal article supplement (https://acs.figshare.com/ndownloader/files/5888304)
Supplement: Supplementary file 1 [file 5888304]

# ORGANOMETALLICS

Organometallics, 1996, 15(12), 2678-2679, DOI:[10.1021/om9601615](https://doi.org/10.1021/om9601615)

## Terms & Conditions

Electronic Supporting Information files are available without a subscription to ACS Web Editions. The American Chemical Society holds a copyright ownership interest in any copyrightable Supporting Information. Files available from the ACS website may be downloaded for personal use only. Users are not otherwise permitted to reproduce, republish, redistribute, or sell any Supporting Information from the ACS website, either in whole or in part, in either machine-readable form or any other form without permission from the American Chemical Society. For permission to reproduce, republish and redistribute this material, requesters must process their own requests via the RightsLink permission system. Information about how to use the RightsLink permission system can be found at <http://pubs.acs.org/page/copyright/permissions.html>

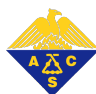

ACS Publications

MOST TRUSTED. MOST CITED. MOST READ.

Copyright © 1996 American Chemical Society

L2679-1

OM 9601615

## Supporting Information

### $\text{Tp}^*\text{Rh}(\text{C}_2\text{H}_4)(\text{PMe}_3)$ **1a**

A stirred solution of  $\text{Tp}^*\text{Rh}(\text{C}_2\text{H}_4)_2$  (0.81 g, 1.75 mmol) in THF (40 ml) is cooled to  $-30\text{ }^\circ\text{C}$  and  $\text{PMe}_3$  is added (1.75 ml of a solution 1M in THF, 1.75 mmol). The initial orange color of the solution becomes pale yellow. After stirring for 15 min. at  $-30\text{ }^\circ\text{C}$ , the solution is warmed to room temperature and stirred during 1 h, after which time the solvent is removed in vacuo, yielding a microcrystalline solid. The NMR spectra of the solid obtained reveals quantitative formation of **1a**, pure enough for preparative purposes. The high sensitivity of this complex to oxygen, coupled with its high solubility in organic solvents prevents its recrystallization and, hence, the elemental analysis determination.

### $\text{Tp}^*\text{Rh}(\text{H})(2\text{-C}_4\text{H}_3\text{S})(\text{PMe}_3)$ **2a**

0.05 g of **1a** (0.1 mmol) are dissolved in thiophene (30 ml) and heated at  $90\text{ }^\circ\text{C}$  during 6h. The yellow solution changes to brown-orange. The thiophene is evaporated under reduced pressure and a brown solid is obtained which contains, as revealed by NMR, 85 % of the title compound, together with small amounts of the isomer  $\text{Tp}^*\text{Rh}(\overline{\text{CHCHCHCHS}})(\text{PMe}_3)$ . Extraction with petroleum ether gives a solution enriched in complex **2a**, although complete separation upon crystallization could not be achieved.

### $\text{Tp}^*\text{Rh}(\overline{\text{CHCHCHCHS}})(\text{PMe}_3)$ **3a**

Complex **1a** (0.23 g, 0.45 mmol) is dissolved in thiophene (50 ml) and transferred to a photoreactor. The mixture is then irradiated, at room

L2679-2

temperature, for 2 h and the resulting orange solution is evaporated to dryness. NMR monitoring of the crude solid obtained reveals the presence of three species: complex **3a** (60 %), complex **2a** (20 %) and another unidentified species (20 %). Extraction of the mixture with petroleum ether (*ca* 2 x 10 ml) leaves **3a** as a solid, which can be crystallized from THF.

Anal. Calcd.: C, 47.16; H, 6.30; N, 15.00. Found: C, 47.16; H, 5.96; N, 14.84.

Complexes **1b-3b** are prepared following procedures analogous than described for **1a-3a**.
